# Supplementary material
Source: HighWire-hosted journal article supplement (https://jnm.snmjournals.org/highwire/filestream/94070/field_highwire_adjunct_files/0/jnm068023_Supplemental_Figures.pdf)
Supplement: jnm068023_Supplemental_Figures.pdf [file jnm068023_Supplemental_Figures.pdf]

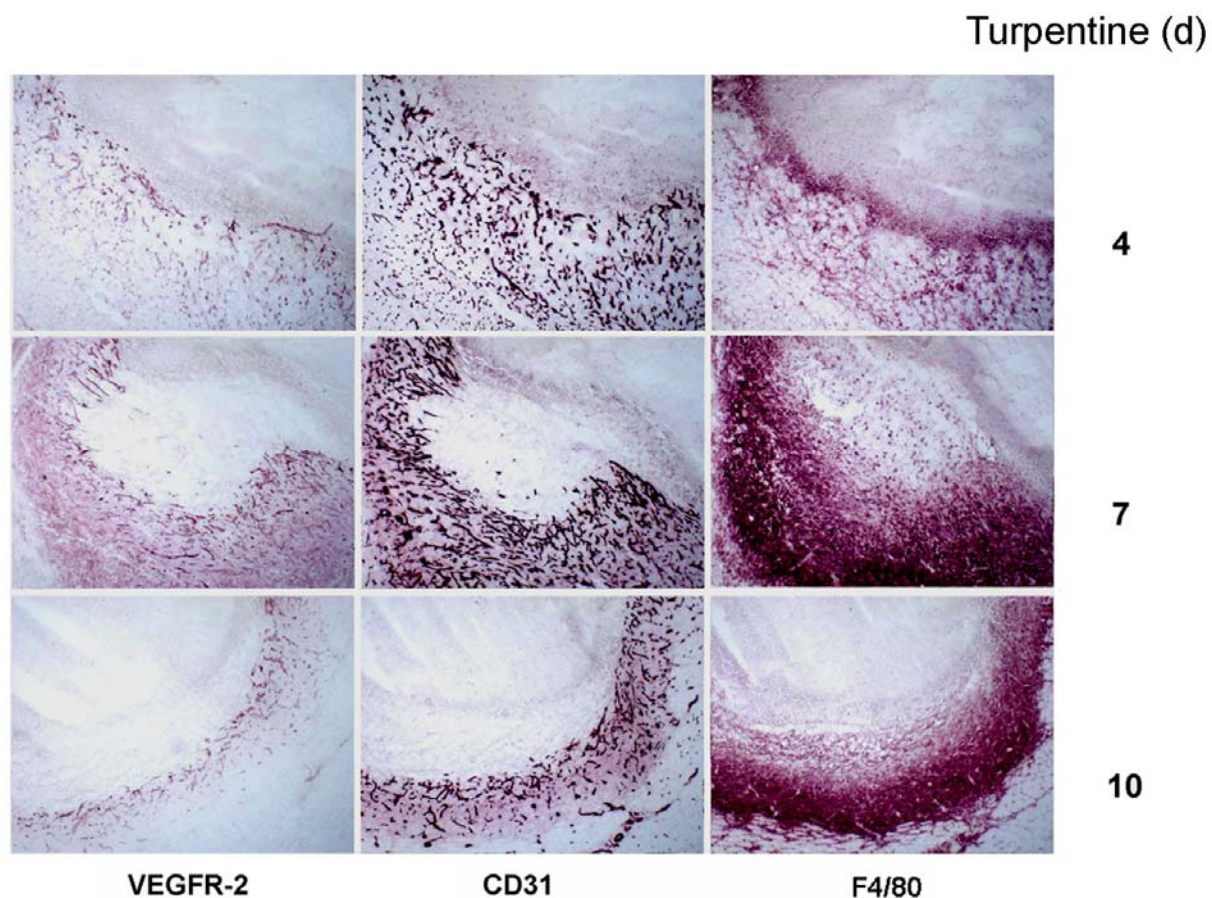

**Supplemental Figure 1A.** IHC staining for VEGFR-2, CD31, and F4/80 at days 4, 7, and 10. Representative serial 20- $\mu$ m histologic frozen sections were stained for VEGFR-2, CD31, and F4/80 (a macrophage marker). VEGFR-2 and F4/80 expression was maximal at approximately day 7 after turpentine injection.

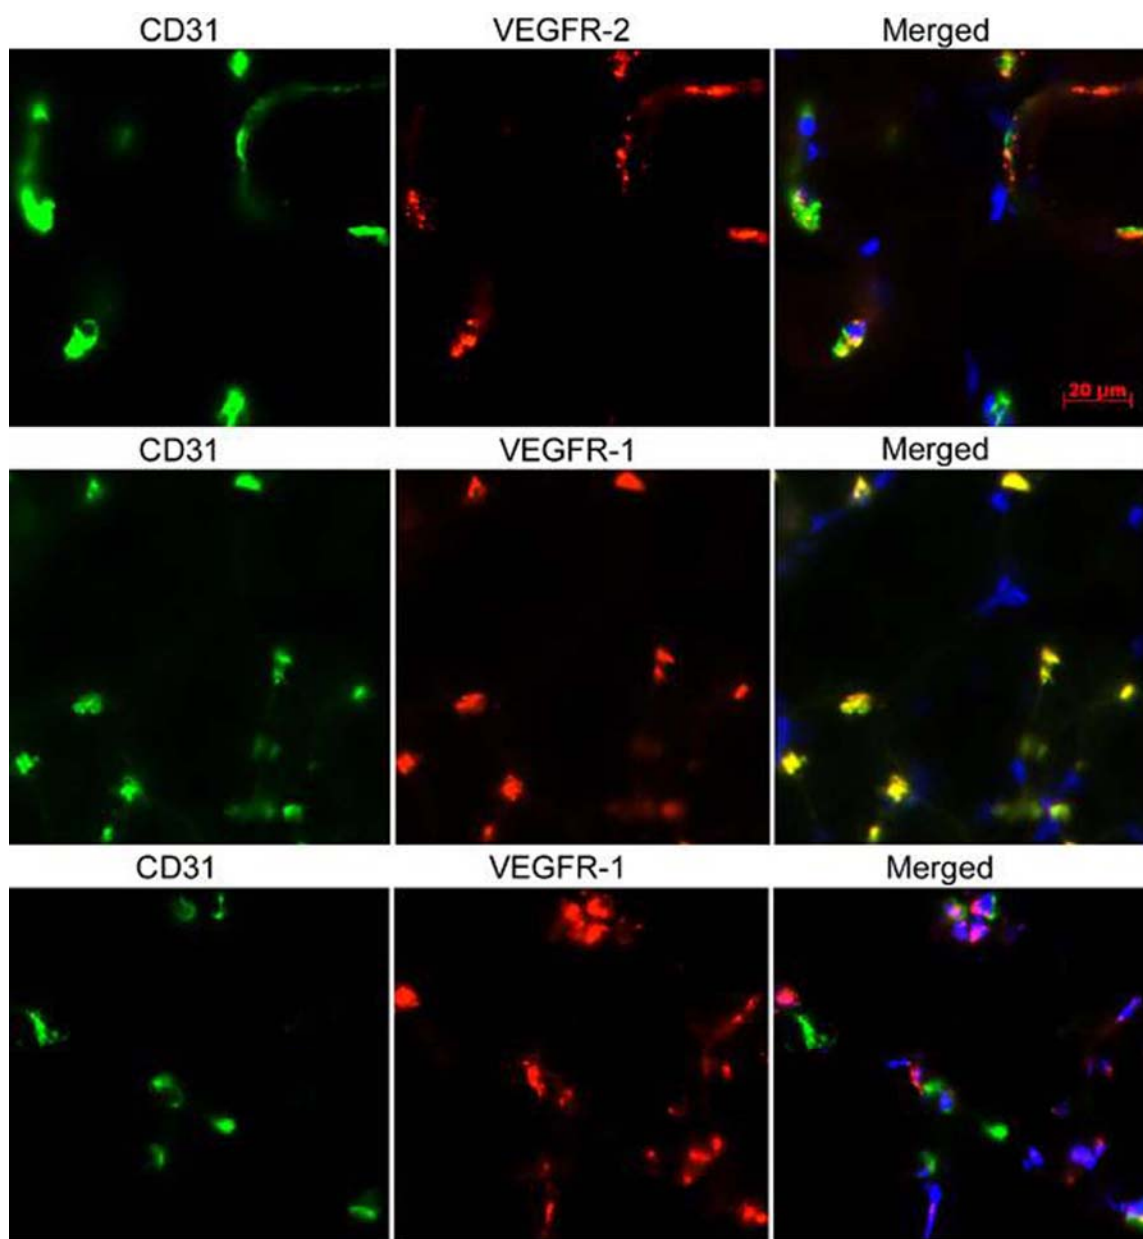

**Supplemental Figure 1B.** Colocalization of VEGFR-2 (upper row) and VEGFR-1 (middle and lower rows) with CD31. Note that VEGFR-2 colocalized with CD31, whereas for VEGFR-1, it was possible to find VEGFR-1-positive cells without CD31 staining (oil,  $\times 40$ ).
